# Supplementary material for: LncRNA KCNQ1OT1 activated by c-Myc promotes cell proliferation via interacting with FUS to stabilize MAP3K1 in acute promyelocytic leukemia
Source: PubMed Central journal article supplement (PMC8371007; doi:10.1038/s41419-021-04080-1), 2021-08-17
Supplement: 41419_2021_4080_MOESM13_ESM.pdf [file 41419_2021_4080_MOESM13_ESM.pdf]

# DECLARATION OF CONTRIBUTIONS TO ARTICLE

# ADMC

|                                     |                                                                                                                                                    |                      |
|-------------------------------------|----------------------------------------------------------------------------------------------------------------------------------------------------|----------------------|
| Manuscript Number:                  | Journal Name:                                                                                                                                      |                      |
| <input type="text"/>                | <i>Cell Death &amp; Disease</i>                                                                                                                    | (the 'Journal')      |
| Proposed Title of the Contribution: | <input type="text"/>                                                                                                                               |                      |
|                                     | <i>LncRNA KCNQ10T1 activated by c-Myc promotes cell proliferation via interacting with FUS to stabilize MAP3K1 in acute promyelocytic leukemia</i> | (the 'Contribution') |
| Author(s):                          | <input type="text"/>                                                                                                                               |                      |
|                                     | <i>Doudou Tang, Yujiao Luo, Yafeng Jiang, Piao Hu, Hongling peng, Shangjie Wu, Guangsen Zhang, Yewei Wang</i>                                      | (the 'Authors')      |

For all *CDDis* articles, each person named as an author in the published version must be able to show he or she has contributed substantially to the article.

Authorship credit should be based on 1) substantial contributions to conception and design, acquisition of data, or analysis and interpretation of data; 2) drafting the article or revising it critically for important intellectual content; and 3) final approval of the version to be published. Authors should meet conditions 1, 2 and 3.

Any person who cannot be shown to have made a substantial contribution to the article cannot be listed as an author in the final version. The name of any person who is deemed to have made a minor contribution can, however, appear in the Acknowledgments section of the article.

Please complete the table below to indicate the contributions of all named authors to the manuscript.

| Author Full Name:    | Specification of Contribution to the Manuscript:                                    |
|----------------------|-------------------------------------------------------------------------------------|
| Doudou Tang          | Designed the study, performed experiments, analyzed data, and wrote the manuscript  |
| Yujiao Luo           | Designed the study, performed experiments, analyzed data                            |
| Yafeng Jiang         | Designed the study, performed experiments, analyzed data and revised the manuscript |
| Piao Hu              | Performed experiments, analyzed data                                                |
| Hongling peng        | Analyzed the data and reviewed the manuscript                                       |
| Shangjie Wu          | Analyzed the data and reviewed the manuscript                                       |
| Guangsen Zhang       | Supervised the research and reviewed the manuscript                                 |
| Yewei Wang           | Conceived and designed the study and wrote the manuscript                           |
| <input type="text"/> | <input type="text"/>                                                                |
| <input type="text"/> | <input type="text"/>                                                                |
| <input type="text"/> | <input type="text"/>                                                                |
| <input type="text"/> | <input type="text"/>                                                                |
| <input type="text"/> | <input type="text"/>                                                                |

Please complete the table below to indicate the contributions of all named authors to the figures.

Figure 1:

Fig 1 A,B,C: DT analyzed the data and generated the graph. D: DT and PH collected the patient samples, performed the experiments and generated the data.

Figure 2:

Fig 2 A,B,C: DT generated the data and prepared the graph. D,E: YL generated the data and prepared the graph.

Figure 3:

Fig 3 A-H: DT generated the data and prepared the graph. I: YJ generated the data and prepared the graph.

Figure 4:

Fig 4 A, B: DT generated the data and prepared the graph. C,D: YJ generated the data and prepared the graph. E,F: DT generated the data and prepared the graph. G-I: YL generated the data and prepared the graph.

Figure 5:

Fig 5A: DT generated the data and prepared the graph. B-G: YL generated the data and prepared the graph.

Figure 6:

Fig 6 A,B: YJ generated the data and prepared the graphs. C: DT performed the experiments and generated the data. D-F: YJ performed the experiments and generated the data.

Signed for and on behalf of the Author(s):

*Yewei Wang*

Print Name:

Yewei Wang

Date:

2021/5/4
